# Supplementary material
Source: PubMed Central journal article supplement (PMC3535843)
Supplement: EC.00130-12_zek999094033so1.pdf [file EC.00130-12_zek999094033so1.pdf]

Cryptococcus\_neoformans 275 YSSPQPEPSYPNYTLPGAQLAFPDFS... 351  
Cryptococcus\_gattii 247 ... 294  
Candida\_parapsilosis 216 ... 281  
Debaromyces\_hansenii 201 ... 267  
Lachancea\_thermotolerans 197 ... 264  
Schizosaccharomyces\_pombe 203 ... 271  
Saccharomyces\_cerevisiae 210 ... 277  
Kluyveromyces\_lactis 259 ... 326  
Zygosaccharomyces\_rouxii 213 ... 280  
Tuber\_melanosporum 213 ... 280  
Emericella\_nidulans 245 ... 312  
Aspergillus\_niger 252 ... 319  
Claviceps\_purpurea 247 ... 321  
Sordaria\_macrospora 299 ... 364  
Botryotinia\_fuckeliana 300 ... 365  
Candida\_glabrata 275 ... 339  
Rhizopus\_oryzae 141 ... 196  
Mucor\_circinelloides 172 ... 227  
Phycomyces\_blakesleanus 175 ... 229  
Coprinopsis\_cinerea 167 ... 209  
Laccaria\_bicolor 168 ... 213  
Moniliophthora\_perniciosa 80 ... 124  
Piriformospora\_indica 207 ... 263  
Neurospora\_crassa 161 ... 221  
Yarrowia\_lipolytica 309 ... 377  
Mixia\_osmundae 176 ... 349  
Melampsora\_larici 185 ... 265  
Malassezia\_globosa 240 ... 302

Cryptococcus\_neoformans 352 ... 405  
Cryptococcus\_gattii 295 ... 348  
Candida\_parapsilosis 282 ... 340  
Debaromyces\_hansenii 268 ... 326  
Lachancea\_thermotolerans 265 ... 343  
Schizosaccharomyces\_pombe 272 ... 358  
Saccharomyces\_cerevisiae 278 ... 360  
Kluyveromyces\_lactis 213 ... 406  
Zygosaccharomyces\_rouxii 281 ... 358  
Tuber\_melanosporum 281 ... 358  
Emericella\_nidulans 313 ... 380  
Aspergillus\_niger 320 ... 386  
Claviceps\_purpurea 322 ... 383  
Sordaria\_macrospora 365 ... 444  
Botryotinia\_fuckeliana 366 ... 438  
Candida\_glabrata 340 ... 415  
Rhizopus\_oryzae 197 ... 252  
Mucor\_circinelloides 228 ... 282  
Phycomyces\_blakesleanus 230 ... 284  
Coprinopsis\_cinerea 210 ... 259  
Laccaria\_bicolor 214 ... 263  
Moniliophthora\_perniciosa 125 ... 175  
Piriformospora\_indica 264 ... 318  
Neurospora\_crassa 222 ... 284  
Yarrowia\_lipolytica 378 ... 440  
Mixia\_osmundae 250 ... 316  
Melampsora\_larici 266 ... 341  
Malassezia\_globosa 303 ... 369

Cryptococcus\_neoformans 406 ... 484  
Cryptococcus\_gattii 349 ... 427  
Candida\_parapsilosis 341 ... 415  
Debaromyces\_hansenii 341 ... 415  
Lachancea\_thermotolerans 344 ... 415  
Schizosaccharomyces\_pombe 359 ... 427  
Saccharomyces\_cerevisiae 361 ... 427  
Kluyveromyces\_lactis 407 ... 478  
Zygosaccharomyces\_rouxii 413 ... 478  
Tuber\_melanosporum 359 ... 478  
Emericella\_nidulans 381 ... 446  
Aspergillus\_niger 384 ... 452  
Claviceps\_purpurea 387 ... 450  
Sordaria\_macrospora 445 ... 509  
Botryotinia\_fuckeliana 439 ... 508  
Candida\_glabrata 416 ... 489  
Rhizopus\_oryzae 253 ... 315  
Mucor\_circinelloides 283 ... 349  
Phycomyces\_blakesleanus 285 ... 351  
Coprinopsis\_cinerea 260 ... 329  
Laccaria\_bicolor 264 ... 333  
Moniliophthora\_perniciosa 176 ... 245  
Piriformospora\_indica 319 ... 388  
Neurospora\_crassa 285 ... 351  
Yarrowia\_lipolytica 441 ... 507  
Mixia\_osmundae 317 ... 382  
Melampsora\_larici 342 ... 407  
Malassezia\_globosa 370 ... 435

Cryptococcus\_neoformans 485 ... 547  
Cryptococcus\_gattii 413 ... 491  
Candida\_parapsilosis 413 ... 462  
Debaromyces\_hansenii 393 ... 462  
Lachancea\_thermotolerans 412 ... 441  
Schizosaccharomyces\_pombe 428 ... 478  
Saccharomyces\_cerevisiae 429 ... 478  
Kluyveromyces\_lactis 475 ... 524  
Zygosaccharomyces\_rouxii 426 ... 475  
Tuber\_melanosporum 426 ... 475  
Emericella\_nidulans 447 ... 521  
Aspergillus\_niger 453 ... 524  
Claviceps\_purpurea 451 ... 535  
Sordaria\_macrospora 530 ... 612  
Botryotinia\_fuckeliana 509 ... 583  
Candida\_glabrata 490 ... 564  
Rhizopus\_oryzae 316 ... 374  
Mucor\_circinelloides 350 ... 412  
Phycomyces\_blakesleanus 350 ... 412  
Coprinopsis\_cinerea 330 ... 411  
Laccaria\_bicolor 334 ... 411  
Moniliophthora\_perniciosa 246 ... 278  
Piriformospora\_indica 389 ... 451  
Neurospora\_crassa 352 ... 401  
Yarrowia\_lipolytica 508 ... 558  
Mixia\_osmundae 383 ... 476  
Melampsora\_larici 408 ... 474  
Malassezia\_globosa 436 ... 511



|                           |                                                          |
|---------------------------|----------------------------------------------------------|
| Cryptococcus_neoformans   | .....                                                    |
| Cryptococcus_gattii       | .....                                                    |
| Candida_parapsilosis      | .....                                                    |
| Debaryomyces_hansenii     | .....                                                    |
| Lachancea_thermotolerans  | .....                                                    |
| Schizosaccharomyces_pombe | .....                                                    |
| Saccharomyces_cerevisiae  | .....                                                    |
| Kluyveromyces_lactis      | .....                                                    |
| Zygosaccharomyces_rouxii  | .....                                                    |
| Tuber_melanosporum        | .....                                                    |
| Emericella_nidulans       | .....                                                    |
| Aspergillus_niger         | .....                                                    |
| Claviceps_purpurea        | .....                                                    |
| Sordaria_macrospora       | .....                                                    |
| Botryotinia_fuckeliana    | .....                                                    |
| Candida_glabrata          | .....                                                    |
| Rhizopus_oryzae           | .....                                                    |
| Mucor_circinelloides      | 795 ALKDIKIKIYAPPERKYSTWIGGSILASLSTFKKMVSAEEYQEDPDIHKKTF |
| Phycomyces_blakesleanus   | .....                                                    |
| Coprinopsis_cinerea       | .....                                                    |
| Laccaria_bicolor          | .....                                                    |
| Moniliophthora_perniciosa | .....                                                    |
| Piriformospora_indica     | .....                                                    |
| Neurospora_crassa         | .....                                                    |
| Yarrowia_lipolytica       | .....                                                    |
| Mixia_osmundae            | .....                                                    |
| Melampsora_larici         | .....                                                    |
| Malassezia_globosa        | .....                                                    |

**Supplementary Figure 1. The C-terminal modulatory region of Mid1 is not conserved among fungi.** The multiple alignment of the primary structure of Mid1 from 28 species of fungi. The sequences were aligned with ClustalW multiple alignment program (22) and viewed with Jalview (43). Black filled triangles indicate 11 conserved cysteine residues among fungi and black filled ovals indicate two conserved CP (cysteine and proline) dipeptide motif. The 24 amino acid C-terminal modulatory domain is indicated by the grey box. Shaded regions correspond to amino acid similarity in Mid1 among fungi.
